# Supplementary material for: Cyclen-functionalized perylenebisimides as sensitive and selective fluorescent sensors for Pb2+ in aqueous solution
Source: Royal Society of Chemistry journal article supplement (doi:10.1039/c1cc11200g), 2011-01-01

## *Supporting Information*

### **Cyclen-functionalized perylenebisimides as sensitive and selective fluorescent sensors for Pb<sup>2+</sup> in aqueous solution**

*Rongqi Zhou, Bijin Li, Ningjie Wu, Ge Gao, Jingsong You and Jingbo Lan\**

*Key Laboratory of Green Chemistry and Technology of Ministry of Education,  
College of Chemistry, and State Key Laboratory of Biotherapy, West China Medical  
School, Sichuan University, 29 Wangjiang Road, Chengdu 610064, PR China*

*Fax: 86-28-85412203; E-mail: jingbolan@scu.edu.cn*

## Contents

|                                                                                                                                                                                |     |
|--------------------------------------------------------------------------------------------------------------------------------------------------------------------------------|-----|
| 1. General remarks.....                                                                                                                                                        | S3  |
| 2. Synthesis and characterization of PBIs.....                                                                                                                                 | S4  |
| 3. References.....                                                                                                                                                             | S6  |
| 4. <b>Figure S1.</b> Fluorescent responses of PBI-1 (0.1 $\mu$ M - 200 $\mu$ M) in HEPES (10 mM, pH = 7.2) .....                                                               | S7  |
| 5. <b>Figure S2.</b> The visual emission of PBI-1 under a UV lamp (365 nm) .....                                                                                               | S7  |
| 6. <b>Figure S3.</b> The pH responses of PBI-1.....                                                                                                                            | S7  |
| 7. <b>Figure S4.</b> Job's plot of PBI-1 and $\text{Pb}^{2+}$ .....                                                                                                            | S8  |
| 8. <b>Figure S5.</b> Fluorescence intensity of PBI-1 at 548nm as a function of $\lg[\text{Pb}^{2+}]$ .....                                                                     | S8  |
| 9. <b>Figure S6.</b> The ESI-TOF mass spectrum of a mixture of PBI-1 and $\text{Pb}^{2+}$ .....                                                                                | S9  |
| 10. <b>Figure S7.</b> Fluorescent responses of PBI-1 (5 $\mu$ M) in 10 mM HEPES (pH=7.2) to various metal ions (5 equiv.), followed by $\text{Pb}^{2+}$ (5 equiv.) .....       | S9  |
| 11. <b>Figure S8.</b> Fluorescent responses of PBI-1 (5 $\mu$ M) in 10 mM HEPES (pH=7.2) to various metal ions (5 equiv.) in the presence of $\text{Pb}^{2+}$ (5 equiv.) ..... | S10 |
| 12. <b>Figure S9.</b> Fluorescence microscopy images of HepG2 cells incubated with PBI-1 and PBI-2.....                                                                        | S10 |
| 13. <b>Figure S10.</b> The pH responses of PBI-2.....                                                                                                                          | S10 |
| 14. <b>Figure S11.</b> Fluorescent responses of PBI-2 (5 $\mu$ M) in 10 mM HEPES/DMSO (v/v = 90/10, pH = 7.2) to various metal ions (25 $\mu$ M).....                          | S11 |
| 15. <b>Figure S12.</b> Fluorescence responses of PBI-2 (5 $\mu$ M) in 10 mM HEPES/DMSO (v/v = 90/10, pH = 7.2) to various concentrations of $\text{Pb}^{2+}$ .....             | S11 |
| 16. <b>Figure S13.</b> Job's plot of PBI-2 and $\text{Pb}^{2+}$ .....                                                                                                          | S12 |
| 17. <b>Figure S14.</b> The nonlinear curve fitting for PBI-2 of the fluorescence intensity at 545 nm against the added amount of $\text{Pb}^{2+}$ .....                        | S12 |
| 18. <b>Figure S15.</b> Fluorescence intensity of PBI-2 at 545 nm as a function of $\lg[\text{Pb}^{2+}]$ .....                                                                  | S12 |
| 19. <b>Figure S16.</b> The ESI-TOF mass spectrum of a mixture of PBI-2 and $\text{Pb}^{2+}$ .....                                                                              | S13 |
| 20. NMR and mass spectra.....                                                                                                                                                  | S14 |

## 1. General Remarks

NMR spectra were obtained on a Bruker AMX-400. The  $^1\text{H}$  NMR (400 MHz) chemical shifts were measured relative to  $\text{CDCl}_3$  or  $\text{DMSO-}d_6$  as the internal reference ( $\text{CDCl}_3$ :  $\delta = 7.26$  ppm;  $\text{DMSO-}d_6$ :  $\delta = 2.50$  ppm). The  $^{13}\text{C}$  NMR (100 MHz) chemical shifts were given using  $\text{CDCl}_3$  and  $\text{DMSO-}d_6$  as the internal standard ( $\text{CDCl}_3$ :  $\delta = 77.16$  ppm;  $\text{DMSO-}d_6$ :  $\delta = 39.52$  ppm). High-resolution mass spectra (HR-MS) were obtained with a Waters-Q-TOF-Premier (ESI). Melting points were determined with XRC-1 and are uncorrected. Absorption spectra were detected on a HITACHI U-2910 spectrometer. Fluorescent emission spectra were collected on a Horiba Jobin Yvon-Edison fluoromax-4 fluorescence spectrometer.

Unless otherwise noted, all reagents were obtained from commercial suppliers and used without further purification. *n*-Octylperylene-3,4:9,10-tetracarboxylic-3,4-anhydride-9,10-imide (**2**),<sup>1</sup> 10-(2-aminoethyl)-1,4,7,10-tetraazacyclododecane-1,4,7-tricarboxylate tri-*tert*-butyl ester (**3**)<sup>2</sup> were prepared according to the literature procedures. Solvents were dried over  $\text{CaH}_2$  or sodium and freshly distilled prior to use. Unless otherwise indicated, all syntheses and manipulations were carried out under  $\text{N}_2$  atmosphere.

DMSO was HPLC grade and water was distilled for twice in the optical spectroscopic studies. Chloride ( $\text{Zn}^{2+}$ ,  $\text{Cd}^{2+}$ ,  $\text{Hg}^{2+}$ ,  $\text{Cu}^{2+}$ ,  $\text{Pb}^{2+}$ ,  $\text{Ba}^{2+}$ ,  $\text{Mn}^{2+}$ ,  $\text{Cr}^{3+}$ ,  $\text{Fe}^{3+}$ ,  $\text{Fe}^{2+}$ ,  $\text{Co}^{2+}$ ,  $\text{Ni}^{2+}$ ,  $\text{Na}^+$ ,  $\text{K}^+$ ,  $\text{Ca}^{2+}$ ,  $\text{Mg}^{2+}$ ), nitrate ( $\text{Ag}^+$ ) were prepared in water as stock solutions for each measurement. Each time a 3 mL of receptor solution was filled in a quartz cell of 1 cm of optical path length and the stock solution of metal ion was dropped into a quartz cell using a microsyringe. The volume of metal ions stock solution added was less than 100  $\mu\text{L}$  to remain the concentration of receptor constant. The excitation and emission slits of fluorescence spectra were set at 2.0 nm if not specified. Fluorescence images was examined under a fluorescence microscopy (OLYMPUS IX71) irradiated by green light source (540-580 nm).

## 2. Synthesis and characterization of PBIs

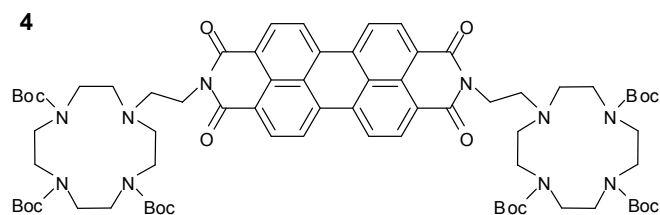

3,4,9,10-perylenetetracarboxylic dianhydride **1** (235 mg, 0.60 mmol) and 10-(2-aminoethyl)-1,4,7,10-tetraazacyclododecane-1,4,7-tricarboxylate tri-*tert*-butyl ester **3** (680 mg, 1.32 mmol) were added into DMF (10 mL) under N<sub>2</sub> and stirred for 20 h at 120 °C. After cooling to room temperature, the mixture was poured into 20 mL water and followed by addition of 50 mL CH<sub>2</sub>Cl<sub>2</sub>. After stirring for 30 min, the organic phase was separated and washed with water (3×10 mL). The organic phases were dried over Na<sub>2</sub>SO<sub>4</sub> and a red residue was obtained after removing the solvent under reduced pressure. Then the residue was purified by column chromatography on silica gel eluting with CH<sub>2</sub>Cl<sub>2</sub>/EtOAc (1:3, v/v) to give the desired product as a dark-red solid (580 mg) at a yield of 70%. Mp = 150-152 °C; <sup>1</sup>H NMR (400 MHz, CDCl<sub>3</sub>): δ = 8.59 (d, *J* = 8.0 Hz, 4H), 8.52 (s, 4H), 4.39 (t, *J* = 7.4 Hz, 4H), 3.58-3.36 (m, 24H), 3.00-2.90 (m, 12H), 1.45 (s, 54H) ppm; <sup>13</sup>C NMR (100 MHz, CDCl<sub>3</sub>): δ = 162.78, 162.74, 156.2, 155.8, 155.5, 133.9, 133.8, 130.8, 128.7, 125.5, 122.8, 79.5, 79.3, 54.9, 53.6, 49.9, 47.9, 28.8, 28.6 ppm; HRMS (ESI): *m/z* calcd for C<sub>74</sub>H<sub>103</sub>N<sub>10</sub>O<sub>16</sub> [M+H]<sup>+</sup> 1387.7554, found 1387.7535.

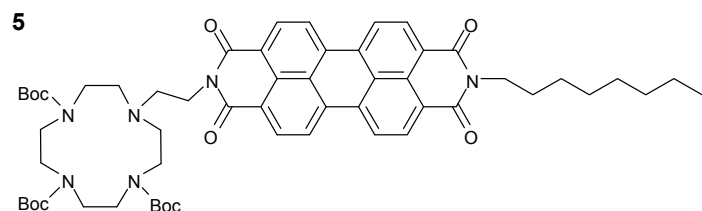

A mixture of **2** (112 mg, 0.22 mmol), **3** (103 mg, 0.20 mmol) and 2 mL DMF were heated under N<sub>2</sub> at 100 °C for 20 h. After cooling to room temperature, the mixture was dispersed in 20 mL water and followed by addition of 50 mL CH<sub>2</sub>Cl<sub>2</sub>. After

stirring for 30 min, the organic phase was separated and washed with water (3×10 mL). The organic phases were dried over Na<sub>2</sub>SO<sub>4</sub> and a red residue was obtained after removing the solvent under reduced pressure. Then the residue was purified by column chromatography on silica gel eluting with CH<sub>2</sub>Cl<sub>2</sub>/EtOAc (1:1, v/v) to give the desired product as a dark-red solid (101 mg) at a yield of 50%. mp: 123-125 °C; <sup>1</sup>H NMR (400 MHz, CDCl<sub>3</sub>): δ = 8.49 (s, 4H), 8.33 (s, 4H), 4.37 (s, 2H), 4.18 (s, 2H), 3.56-3.45 (m, 12H), 3.04-2.93 (m, 6H), 1.77 (s, 2H), 1.46-1.29 (m, 37H), 0.88 (s, 3H) ppm; <sup>13</sup>C NMR (100 MHz, CDCl<sub>3</sub>): δ = 162.5, 155.9, 155.5, 133.2, 133.0, 130.3, 128.3, 124.9, 122.9, 122.4, 122.3, 79.6, 79.5, 79.3, 54.8, 53.3, 49.9, 47.8, 47.2, 40.8, 31.9, 29.7, 29.5, 29.4, 28.8, 28.6, 28.1, 27.4, 22.8, 14.2 ppm; HRMS (ESI): m/z calcd for C<sub>57</sub>H<sub>73</sub>N<sub>6</sub>O<sub>10</sub> [M+H]<sup>+</sup> 1001.5388, found 1001.5376.

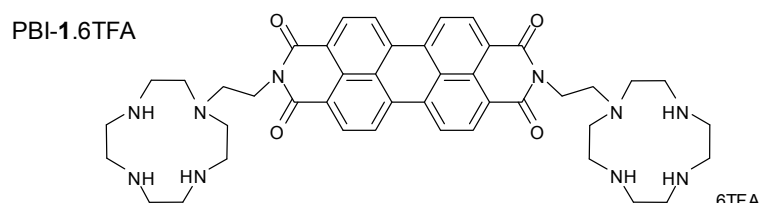

The compound **4** was dissolved in CH<sub>2</sub>Cl<sub>2</sub>/TFA (1:1) and stirred for 12 h at room temperature. The solvent and excess trifluoroacetic acid were removed under reduced pressure, giving a dark-red solid. The solid was dissolved in water and washed with CH<sub>2</sub>Cl<sub>2</sub> (3×10 mL). After phase separation, the solvent was removed in vacuo to give the product as a red solid without further purification. Yield: 100%. Mp > 300 °C; <sup>1</sup>H NMR (400 MHz, DMSO-*d*<sub>6</sub>): δ = 8.72 (t, *J* = 8.8 Hz, 4H), 8.45 (d, *J* = 7.2 Hz, 4H), 4.23 (s, 4H), 3.14-2.82 (m, 36H) ppm; <sup>13</sup>C NMR (100 MHz, DMSO-*d*<sub>6</sub>): δ = 162.6, 158.8, 158.5, 133.3, 130.4, 127.8, 124.6, 123.6, 121.8, 118.6, 115.6, 49.7, 47.7, 44.6, 42.5, 42.0 ppm; HRMS (ESI<sup>+</sup>): m/z calcd for C<sub>44</sub>H<sub>55</sub>N<sub>10</sub>O<sub>4</sub> [M+H]<sup>+</sup> 787.4408, found 787.4398.

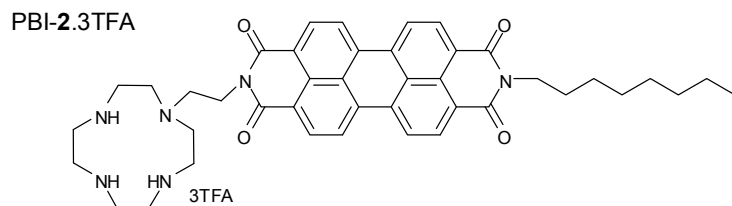

The compound **5** was dissolved in  $\text{CH}_2\text{Cl}_2/\text{TFA}$  (1:1) and stirred for 12 h at room temperature. The solvent and excess trifluoroacetic acid were removed under reduced pressure, giving a dark-red solid as the product without further purification. Yield: 100%. Mp > 300 °C;  $^1\text{H}$  NMR (400 MHz,  $\text{DMSO-}d_6$ ):  $\delta$  = 8.17-8.00 (m, 8H), 7.29 (brs, 2H), 4.19 (s, 2H), 3.94 (s, 2H), 3.17-2.85 (m, 18H), 1.67 (s, 2H), 1.38-1.31 (m, 10H), 0.90 (s, 3H) ppm;  $^{13}\text{C}$  NMR (100 MHz,  $\text{DMSO-}d_6$ ):  $\delta$  = 162.1, 161.7, 132.7, 132.2, 129.8, 129.4, 127.1, 126.8, 123.8, 123.6, 123.1, 122.9, 121.2, 121.0, 49.1, 47.6, 44.6, 43.3, 42.5, 42.0, 31.2, 28.7, 28.6, 27.2, 26.6, 22.0, 13.9 ppm; HRMS (ESI<sup>+</sup>): m/z calcd for  $\text{C}_{42}\text{H}_{49}\text{N}_6\text{O}_4$  [M+H]<sup>+</sup> 701.3815, found 701.3799.

### 3. References

1. Y. Nagao and T. Misono, *Bull. Chem. Soc. Jpn.*, 1981, **54**, 1191.
2. R. Reichenbach-Klinke, M. Kruppa and B. König, *J. Am. Chem. Soc.*, 2002, **124**, 12999.

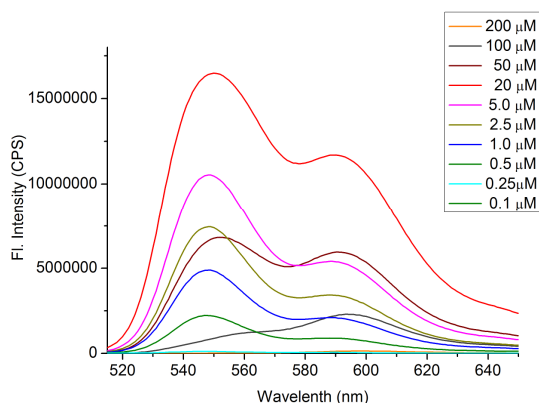

**Figure S1.** Fluorescent responses of PBI-1 (0.1 μM - 200 μM) in HEPES (10 mM, pH = 7.2). ( $\lambda_{ex}$  = 495 nm,  $\lambda_{em}$  = 548 nm)

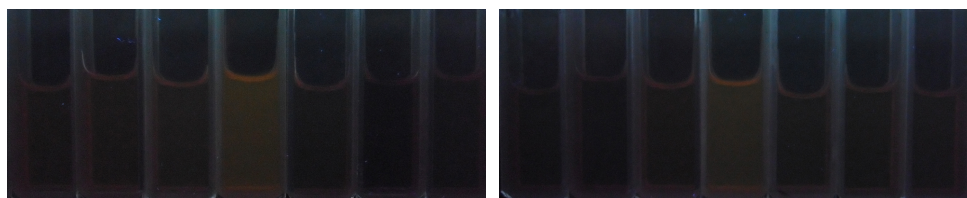

**Figure S2.** The color change of PBI-1 (30 μM) in HEPES (10 mM, pH = 7.2) under a UV lamp (365 nm) by addition of 2 equiv. different metal ions (from left to right: no metal ion, Zn<sup>2+</sup>, Cd<sup>2+</sup>, Pb<sup>2+</sup>, Hg<sup>2+</sup>, Cu<sup>2+</sup>, Ag<sup>+</sup>) (left) and after 5 days (right).

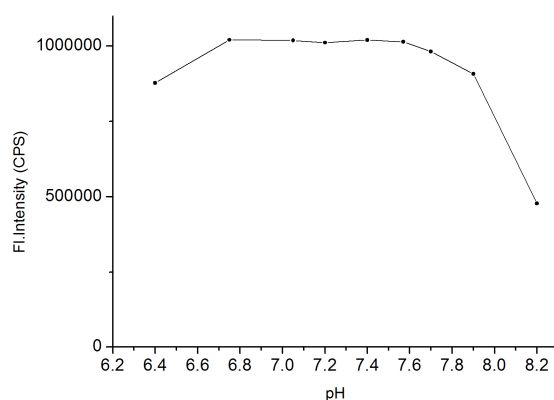

**Figure S3.** Effect of pH on the fluorescence intensity at 548 nm of PBI-1 (5 μM) in buffer solution. The pH of solution was adjusted by aqueous solution of NaOH (1 M) and HCl (1 M).

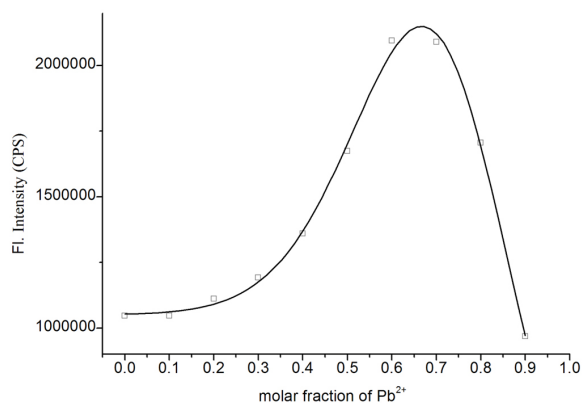

**Figure S4.** Job's plot of PBI-1 and Pb<sup>2+</sup>. The total concentration of PBI-1 and Pb<sup>2+</sup> were kept at 10  $\mu$ M in HEPES (10 mM, pH = 7.2). ( $\lambda_{\text{ex}} = 495$  nm,  $\lambda_{\text{em}} = 548$  nm).

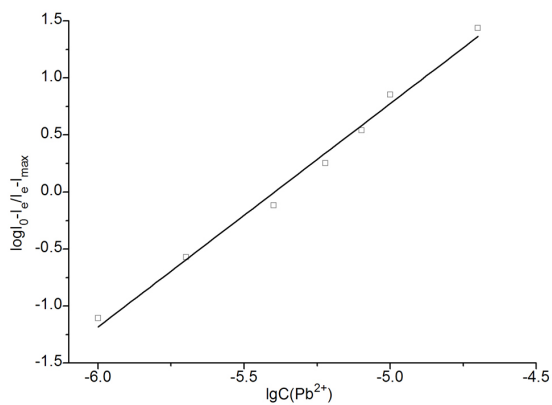

**Figure S5.** Fluorescence intensity of PBI-1 at 548 nm as a function of lg[Pb<sup>2+</sup>] (2.50 - 50  $\mu$ M) in the condition of the Pb<sup>2+</sup> titration. ( $r = 0.990$ )



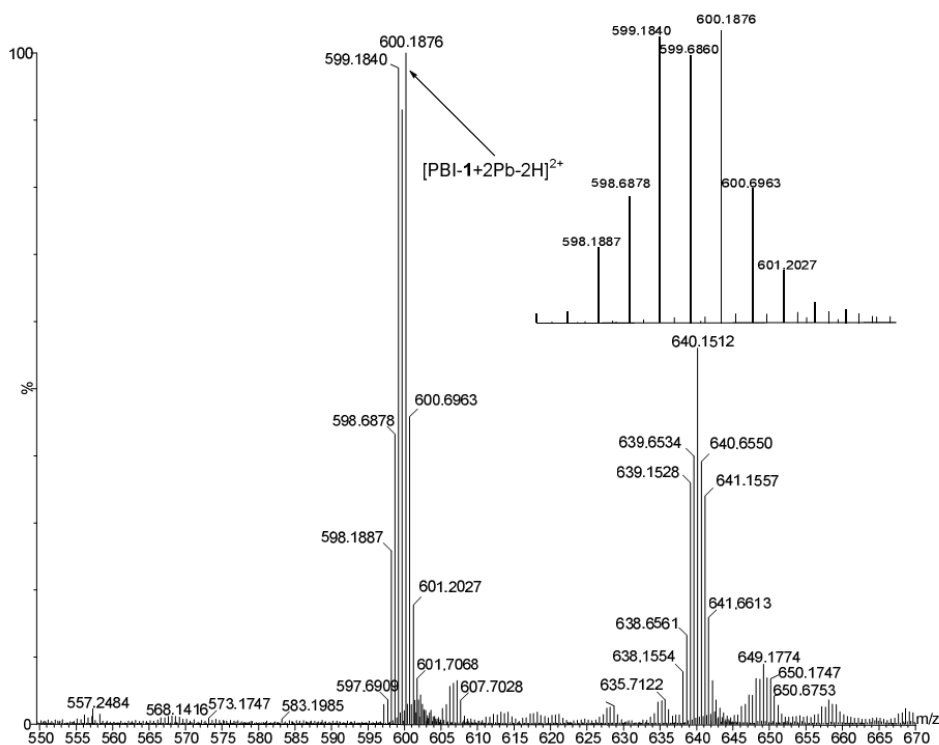

**Figure S6.** The ESI-TOF mass spectrum of a mixture of PBI-1 and Pb(ClO<sub>4</sub>)<sub>2</sub>.

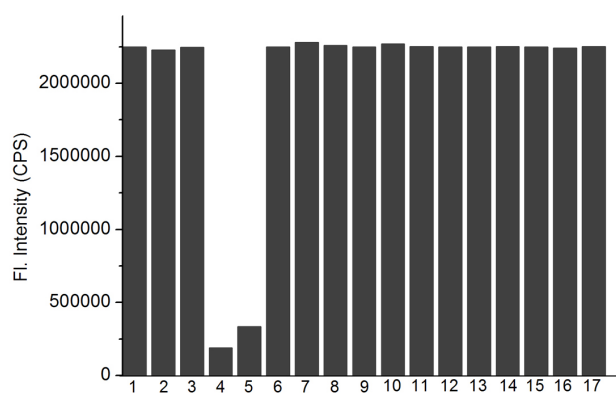

**Figure S7.** Fluorescent responses of PBI-1 (5 μM) in 10 mM HEPES (pH = 7.2) to various metal ions (5 equiv.), followed by Pb<sup>2+</sup> (5 equiv.): 1, none; 2, Zn<sup>2+</sup>; 3, Cd<sup>2+</sup>; 4, Cu<sup>2+</sup>; 5, Hg<sup>2+</sup>; 6, Ag<sup>+</sup>; 7, Fe<sup>2+</sup>; 8, Fe<sup>3+</sup>; 9, Mn<sup>2+</sup>; 10, Cr<sup>3+</sup>; 11, Co<sup>2+</sup>; 12, Ni<sup>2+</sup>; 13, Na<sup>+</sup>; 14, K<sup>+</sup>; 15, Ca<sup>2+</sup>; 16, Ba<sup>2+</sup>; 17, Mg<sup>2+</sup>. (λ<sub>ex</sub> = 495 nm, λ<sub>em</sub> = 548 nm)

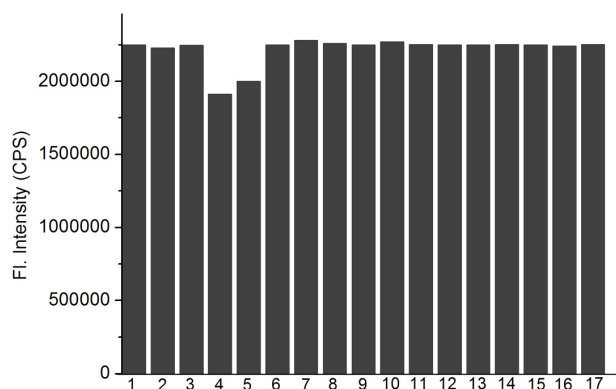

**Figure S8.** Fluorescent responses of PBI-1 (5  $\mu\text{M}$ ) in 10 mM HEPES (pH=7.2) to various metal ions (5 equiv.) in the presence of  $\text{Pb}^{2+}$  (5 equiv.): 1, none; 2,  $\text{Zn}^{2+}$ ; 3,  $\text{Cd}^{2+}$ ; 4,  $\text{Cu}^{2+}$ ; 5,  $\text{Hg}^{2+}$ ; 6,  $\text{Ag}^{+}$ ; 7,  $\text{Fe}^{2+}$ ; 8,  $\text{Fe}^{3+}$ ; 9,  $\text{Mn}^{2+}$ ; 10,  $\text{Cr}^{3+}$ ; 11,  $\text{Co}^{2+}$ ; 12,  $\text{Ni}^{2+}$ ; 13,  $\text{Na}^{+}$ ; 14,  $\text{K}^{+}$ ; 15,  $\text{Ca}^{2+}$ ; 16,  $\text{Ba}^{2+}$ ; 17,  $\text{Mg}^{2+}$ . ( $\lambda_{\text{ex}} = 495 \text{ nm}$ ,  $\lambda_{\text{em}} = 548 \text{ nm}$ )

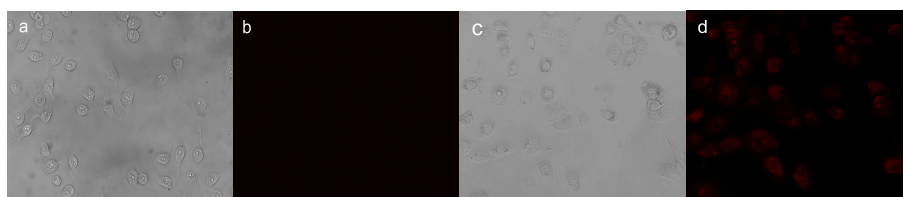

**Figure S9.** Fluorescence microscopy images of HepG2 cells incubated with (b) PBI-1, (d) PBI-2 in D-HBSS; (a)/(c) were the brightfield images corresponding to (b)/(d), respectively.

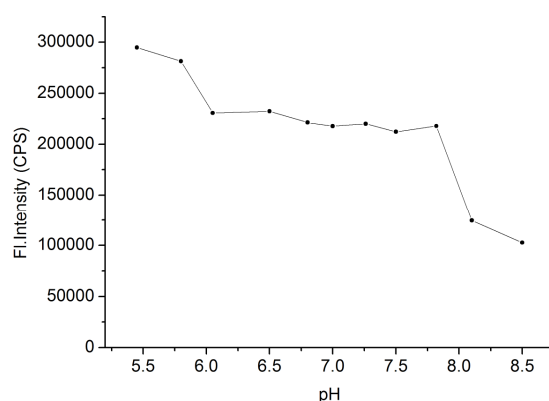

**Figure S10.** Effect of pH on the fluorescence intensity at 545 nm of PBI-2 (5  $\mu\text{M}$ ) in buffer solution. The pH of solution was adjusted by aqueous solution of NaOH (1 M) and HCl (1 M). ( $\lambda_{\text{ex}} = 490 \text{ nm}$ ,  $\lambda_{\text{em}} = 545 \text{ nm}$ , slit = 8 nm/8 nm)

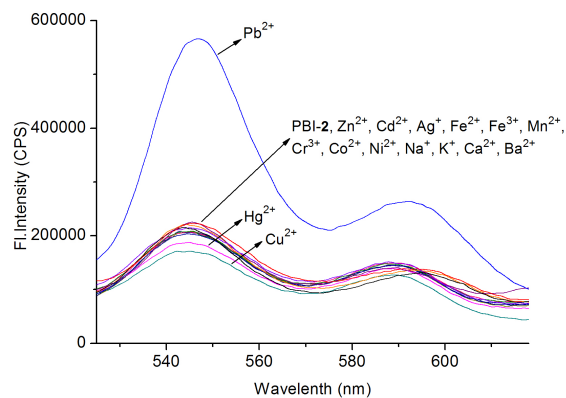

**Figure S11.** Fluorescent responses of PBI-2 (5  $\mu\text{M}$ ) in 10 mM HEPES/DMSO (v/v = 90/10, pH = 7.2) to various metal ions (25  $\mu\text{M}$ ) respectively. ( $\lambda_{\text{ex}}$  = 490 nm,  $\lambda_{\text{em}}$  = 545 nm, slit = 8 nm/8 nm)

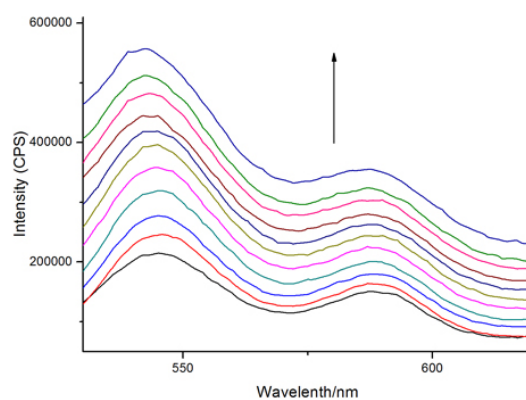

**Figure S12.** Fluorescence responses of PBI-2 (5  $\mu\text{M}$ ) in 10 mM HEPES/DMSO (v/v = 90/10, pH = 7.2) to various concentrations of  $\text{Pb}^{2+}$ . ( $\lambda_{\text{ex}}$  = 490 nm,  $\lambda_{\text{em}}$  = 545 nm, slit = 8 nm/8 nm)

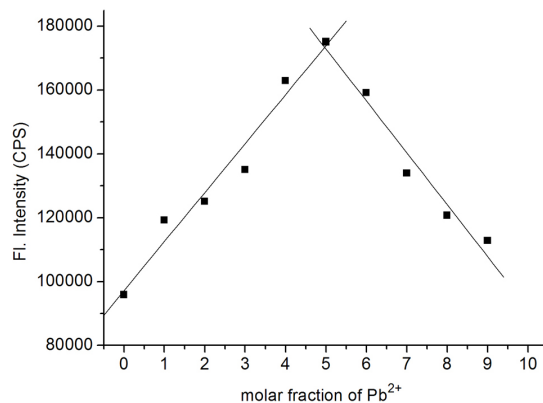

**Figure S13.** Job's plot of PBI-2 and Pb<sup>2+</sup>. The total concentration of PBI-2 and Pb<sup>2+</sup> were kept at 10  $\mu$ M in 10 mM HEPES/DMSO (v/v = 90/10, pH = 7.2). ( $\lambda_{ex}$  = 490 nm,  $\lambda_{em}$  = 545 nm, slit = 8 nm/5 nm).

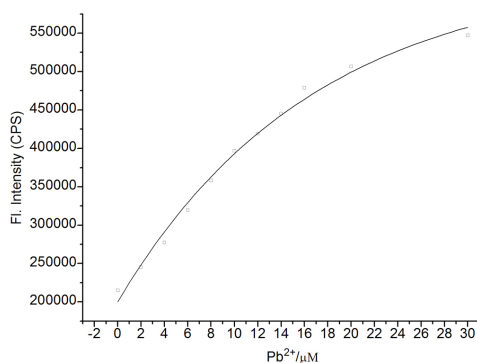

**Figure S14.** The nonlinear curve fitting for PBI-2 of the fluorescence intensity at 545 nm against the added amount of Pb<sup>2+</sup> (2 - 30  $\mu$ M).

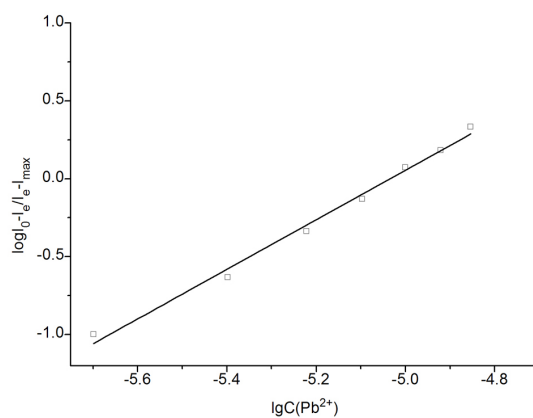

**Figure S15.** Fluorescence intensity of PBI-2 at 545 nm as a function of  $\lg[\text{Pb}^{2+}]$  (2 - 15  $\mu$ M) in the condition of the Pb<sup>2+</sup> titration. ( $r = 0.991$ ).

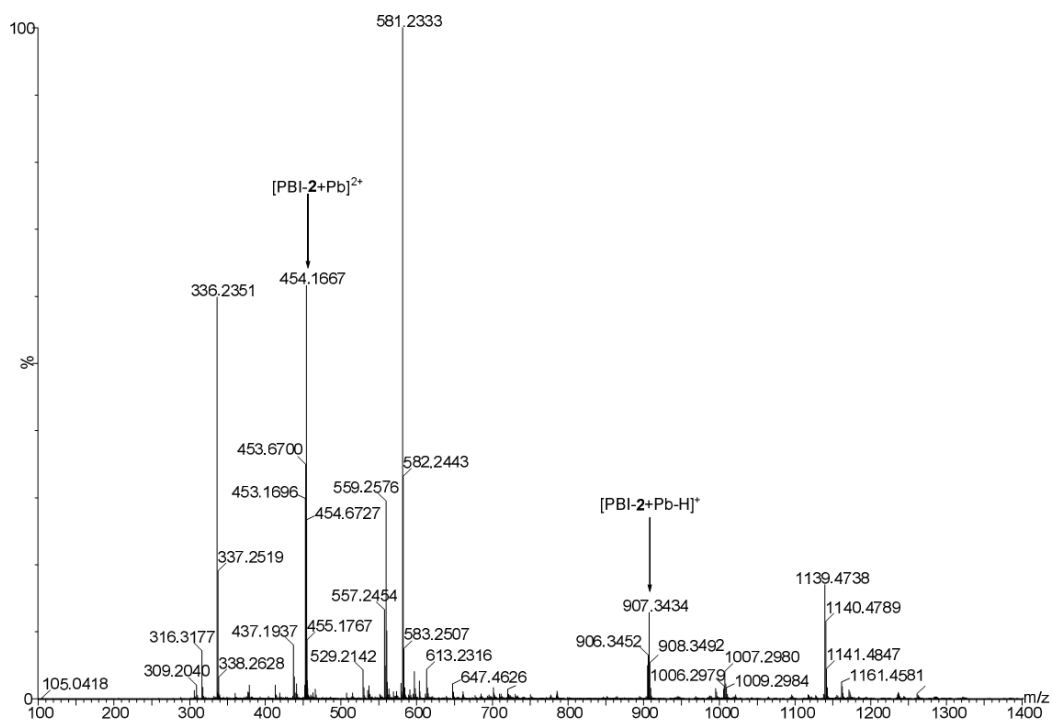

**Figure S16.** The ESI-TOF mass spectrum of a mixture of PBI-2 and Pb(ClO<sub>4</sub>)<sub>2</sub>.

## VI. Copies of $^1\text{H}$ and $^{13}\text{C}$ NMR spectra

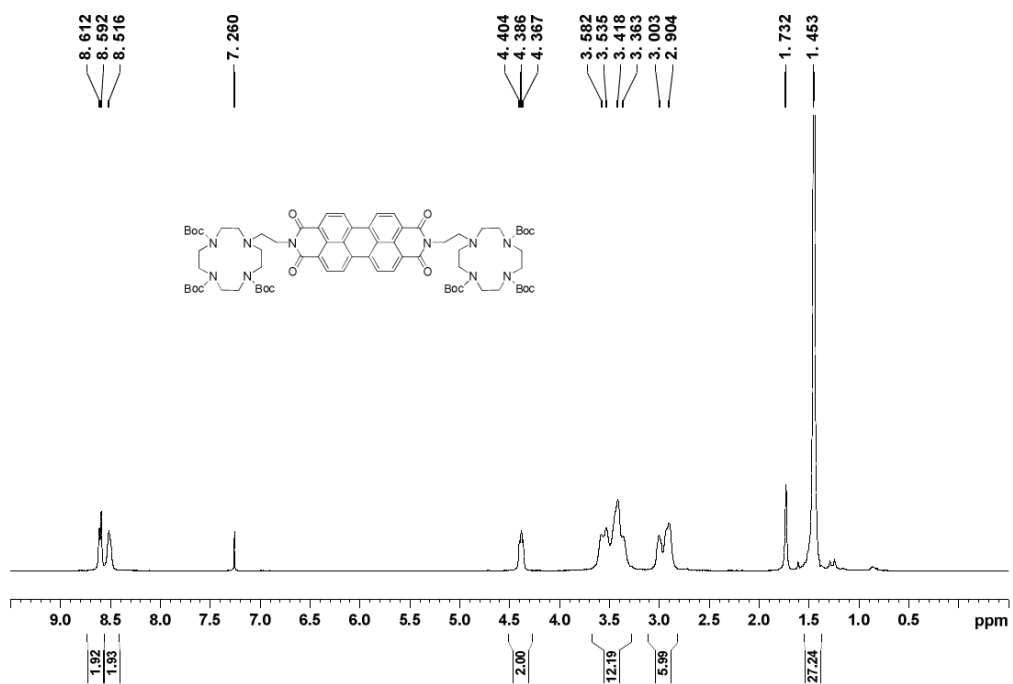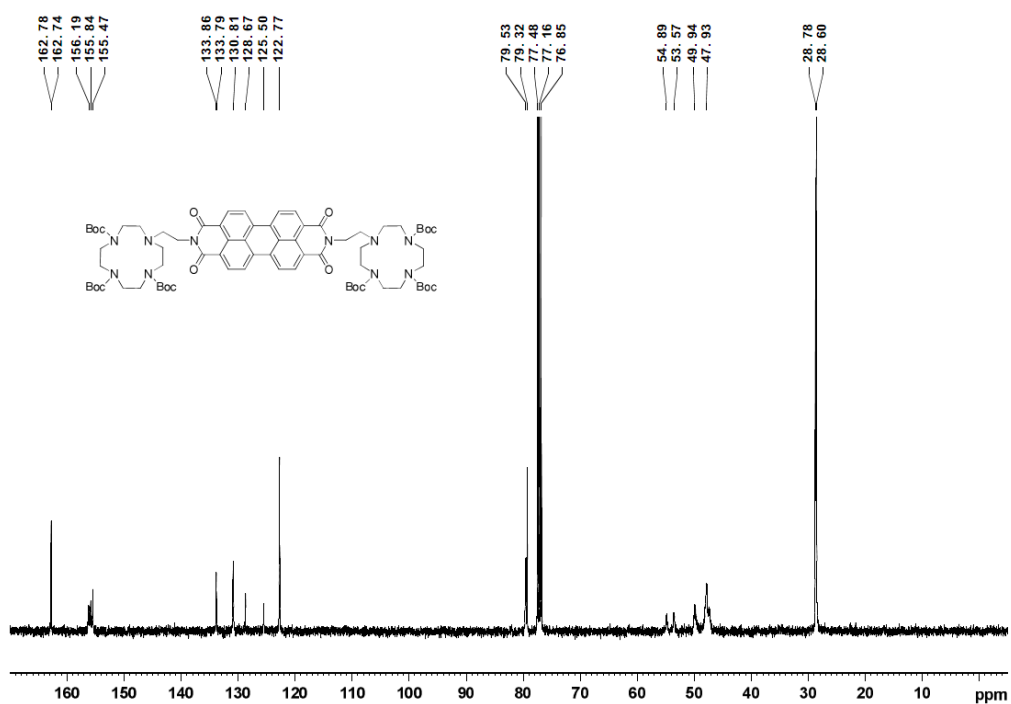

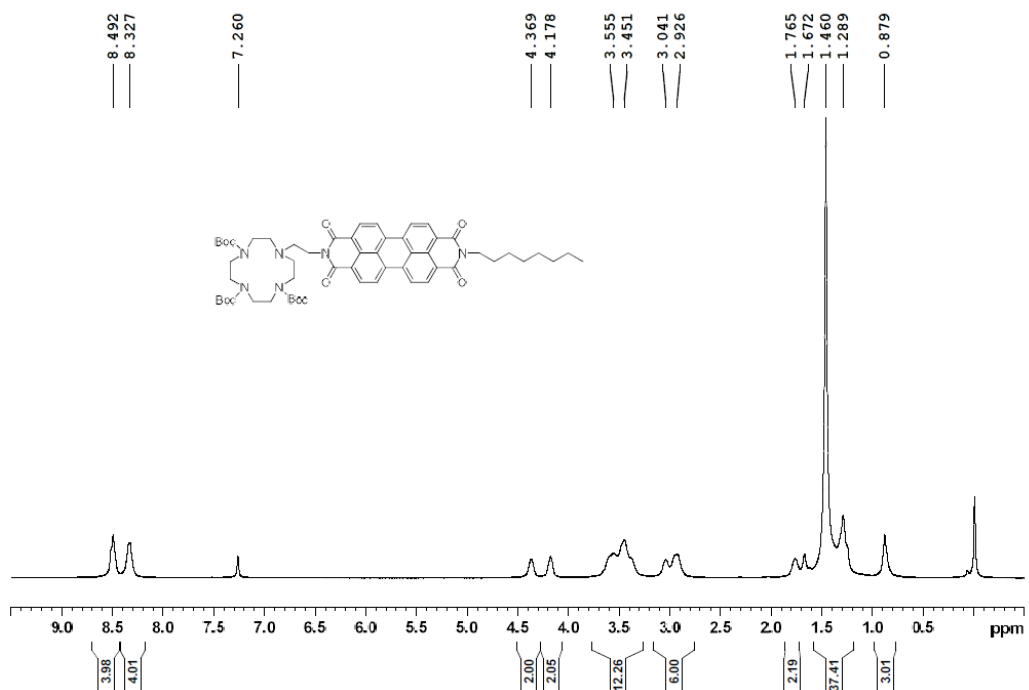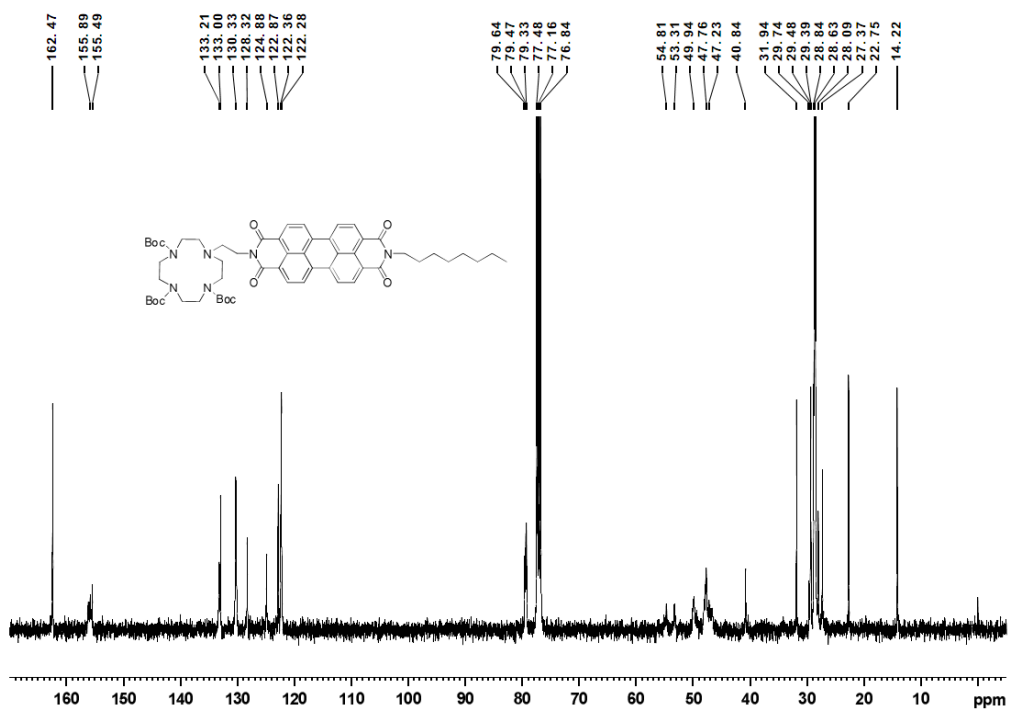

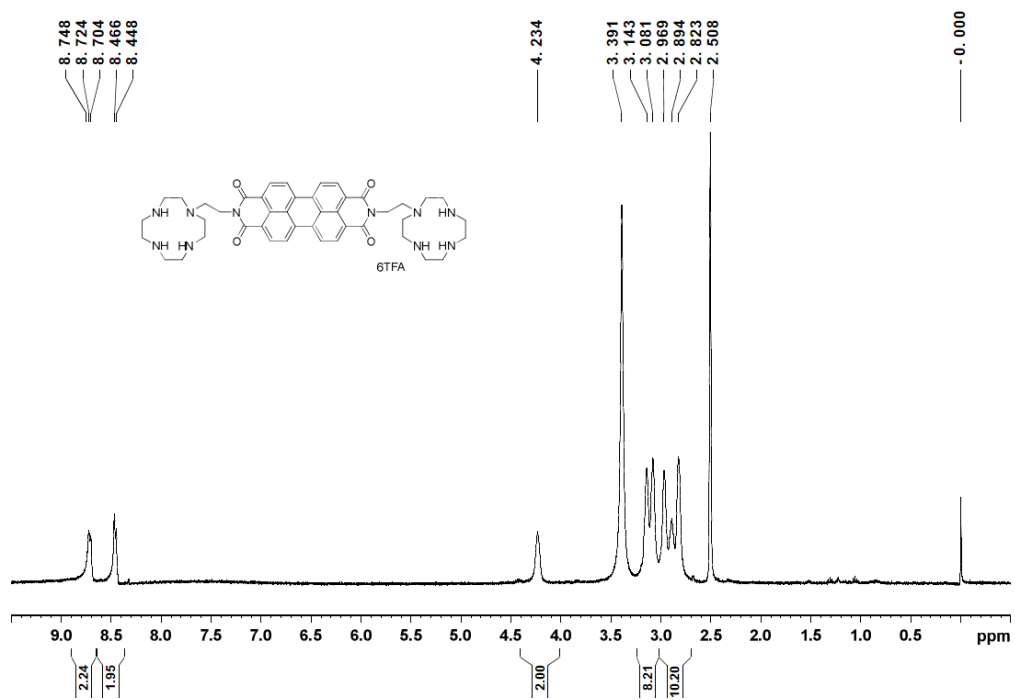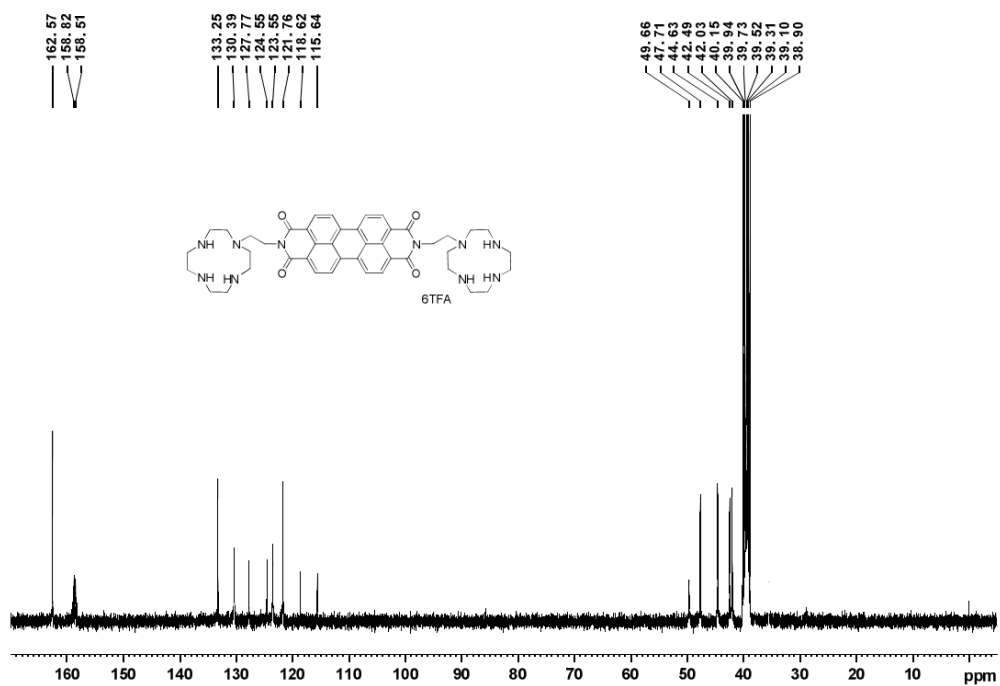



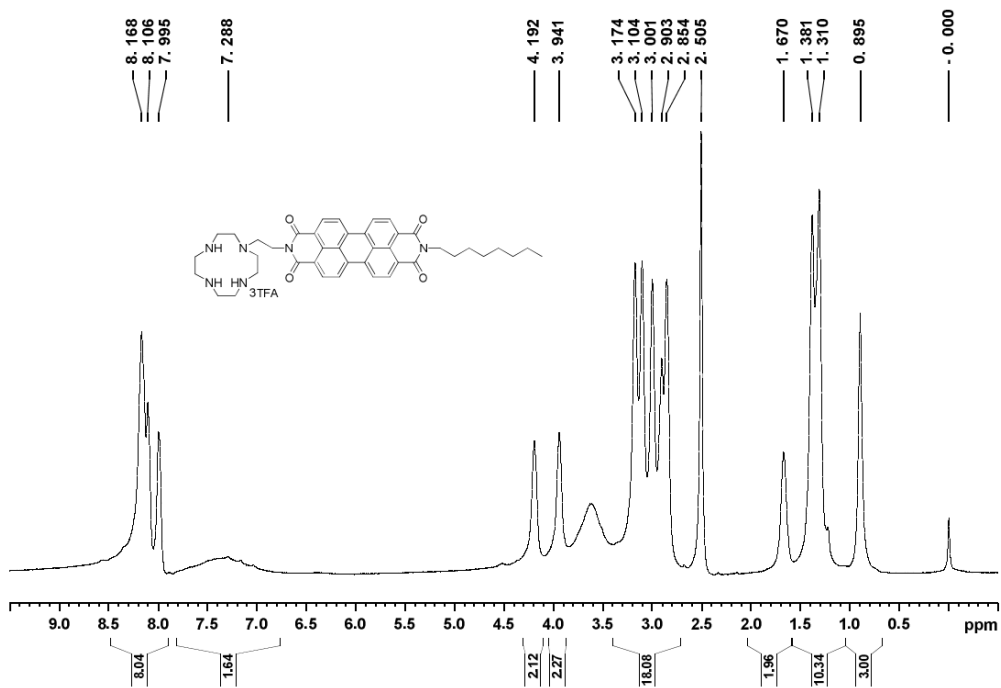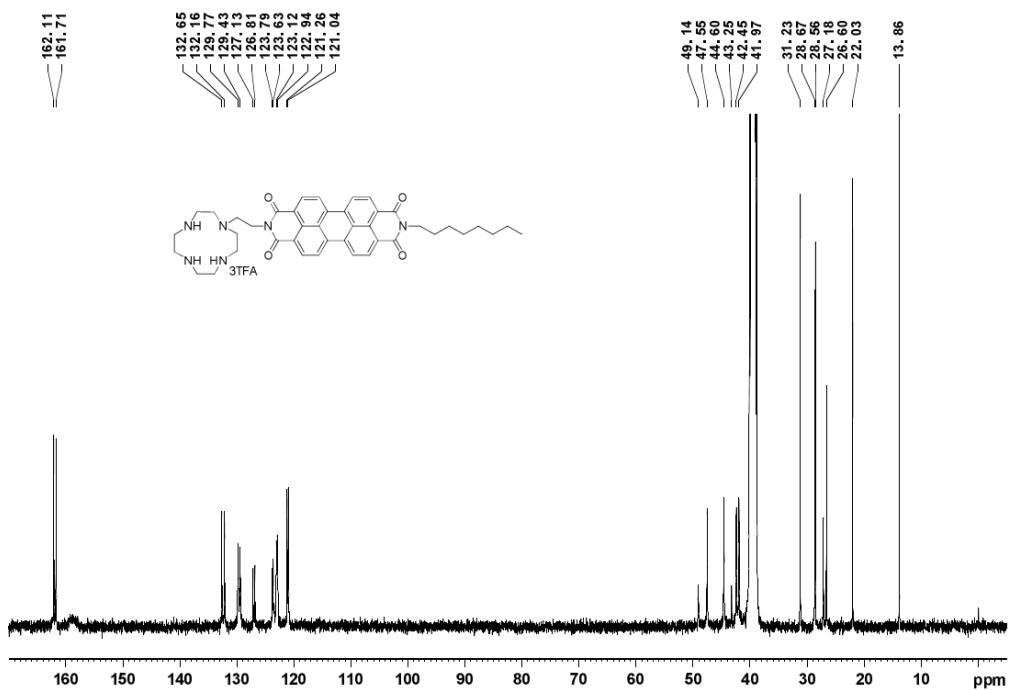

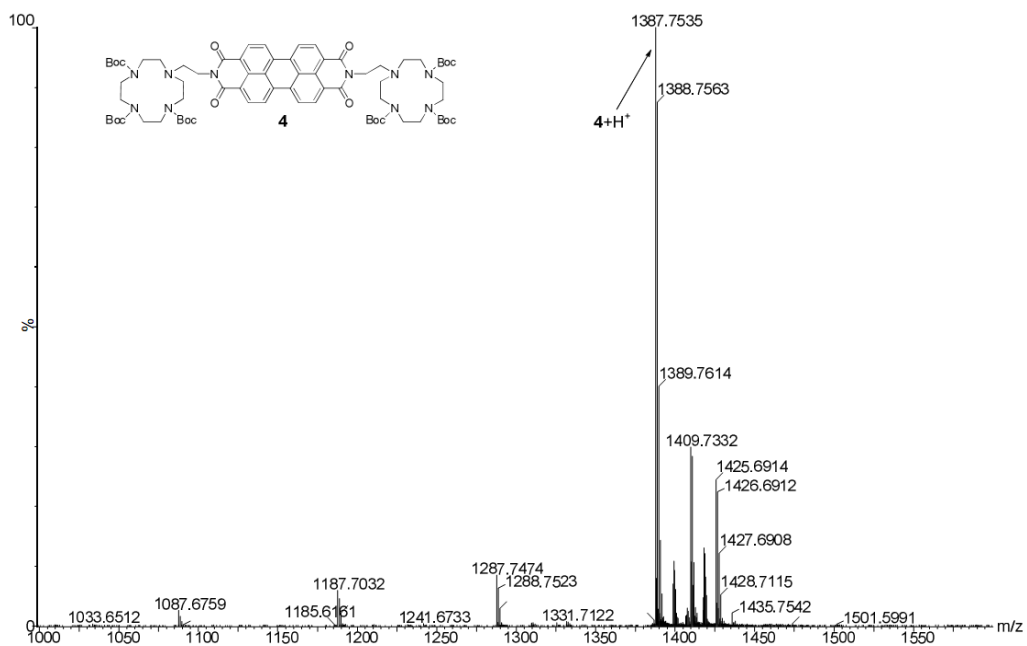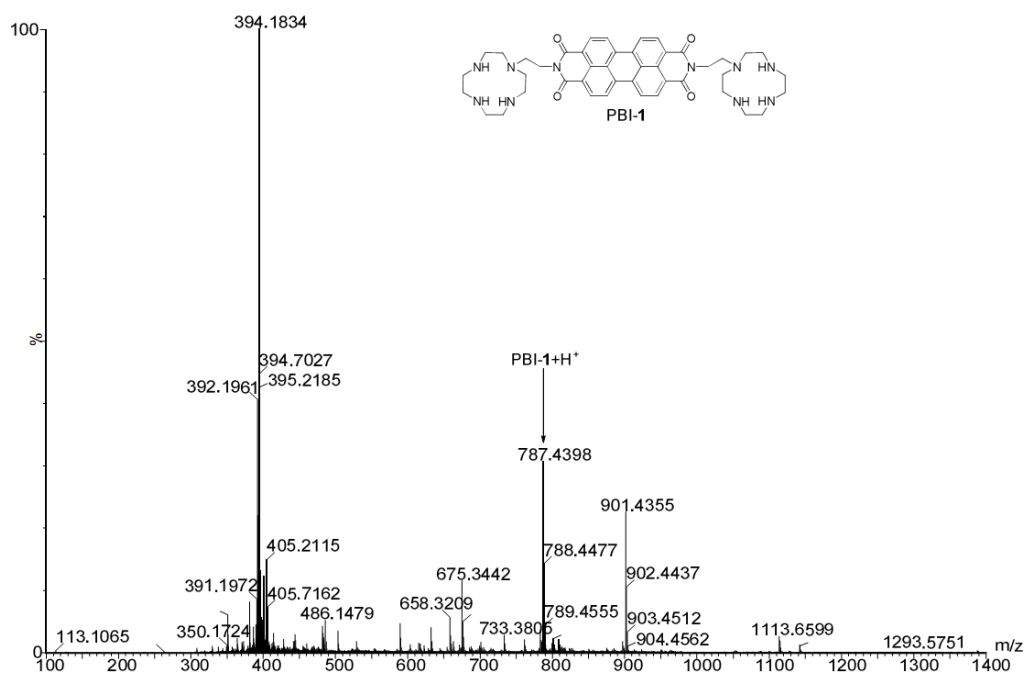

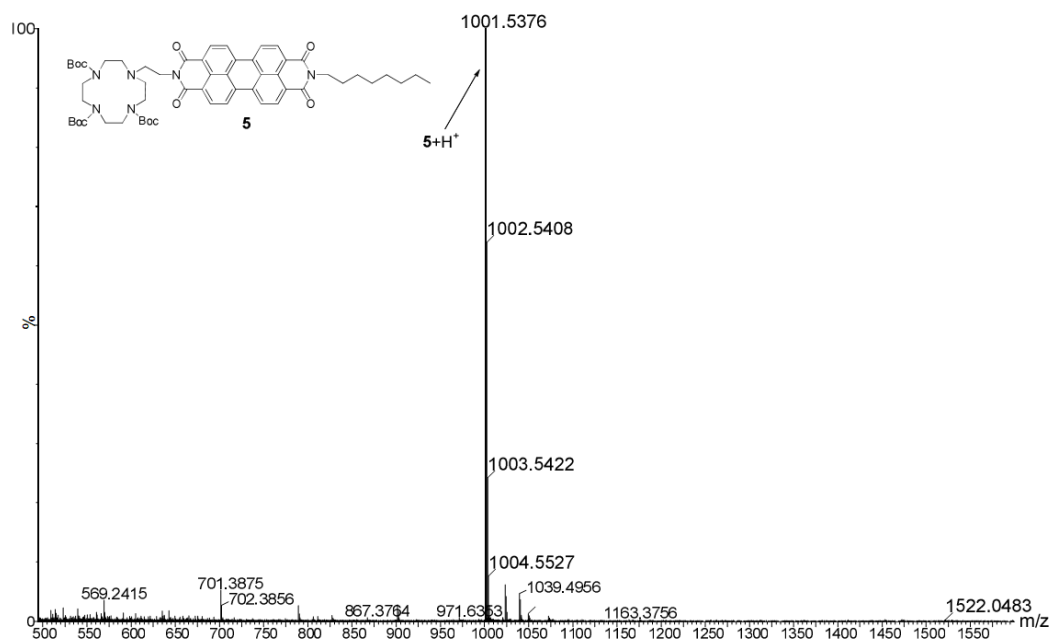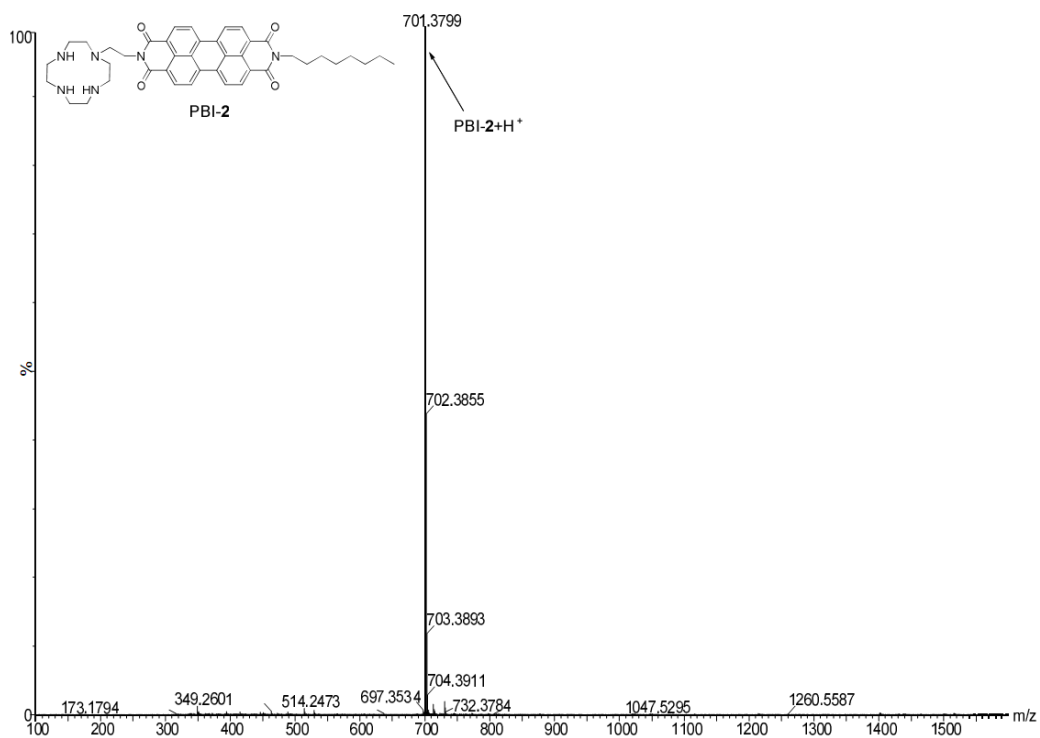

Supplement: c1cc11200g.pdf [file c1cc11200g.pdf]
